# Supplementary material for: Golgi fragmentation – One of the earliest organelle phenotypes in Alzheimer’s disease neurons
Source: PubMed Central journal article supplement (PMC9978754; doi:10.3389/fnins.2023.1120086), 2023-02-16
Supplement: Data_Sheet_1.pdf [file Data_Sheet_1.pdf]

*Supplementary Material*

**Golgi fragmentation - One of the earliest organelle phenotypes in Alzheimer's disease neurons**

**SUPPLEMENTARY INFORMATION**

**1 Supplementary Figures**

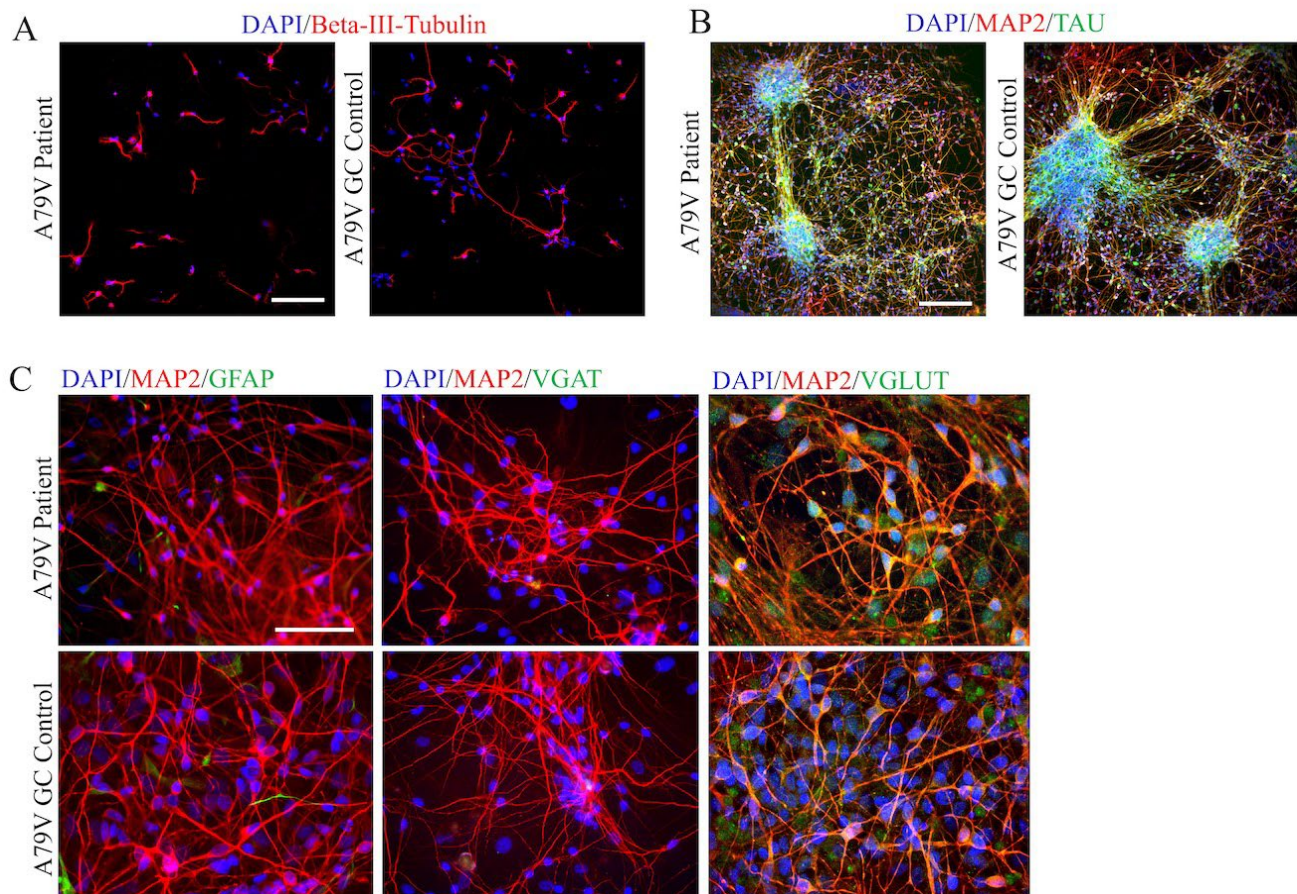

**Figure S1.** Generation and characterization of A79V hiPSC derived neurons. **A.** Neurite outgrowth analysis via ICC expression of Beta-III-tubulin. Scale bar 100  $\mu$ m. **B.** Representative ICC images of neuronal markers MAP2 and TAU. Scale bar 100  $\mu$ m. **C.** Representative ICC images of MAP2,

astrocytic marker GFAP, GABAergic neuron marker VGAT and glutamatergic neuron marker VGLUT. Scale bar 50  $\mu\text{m}$ .

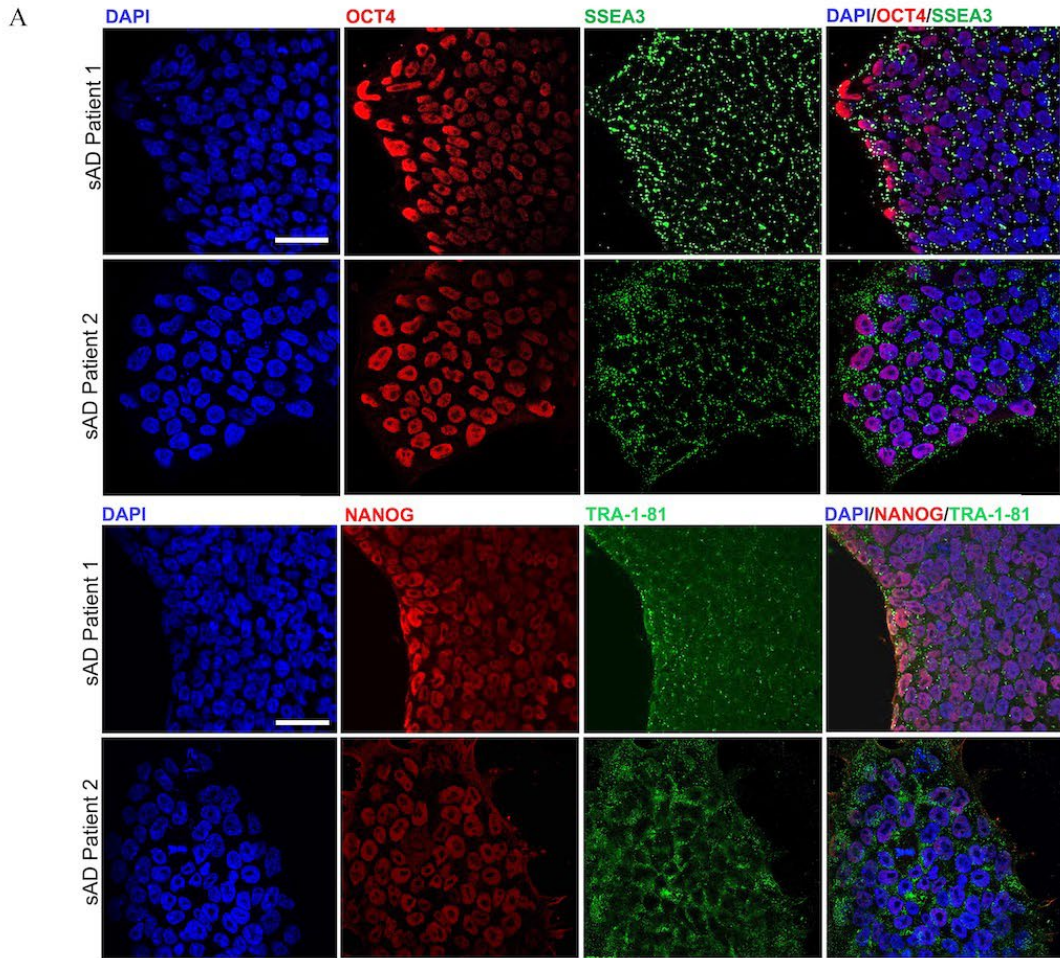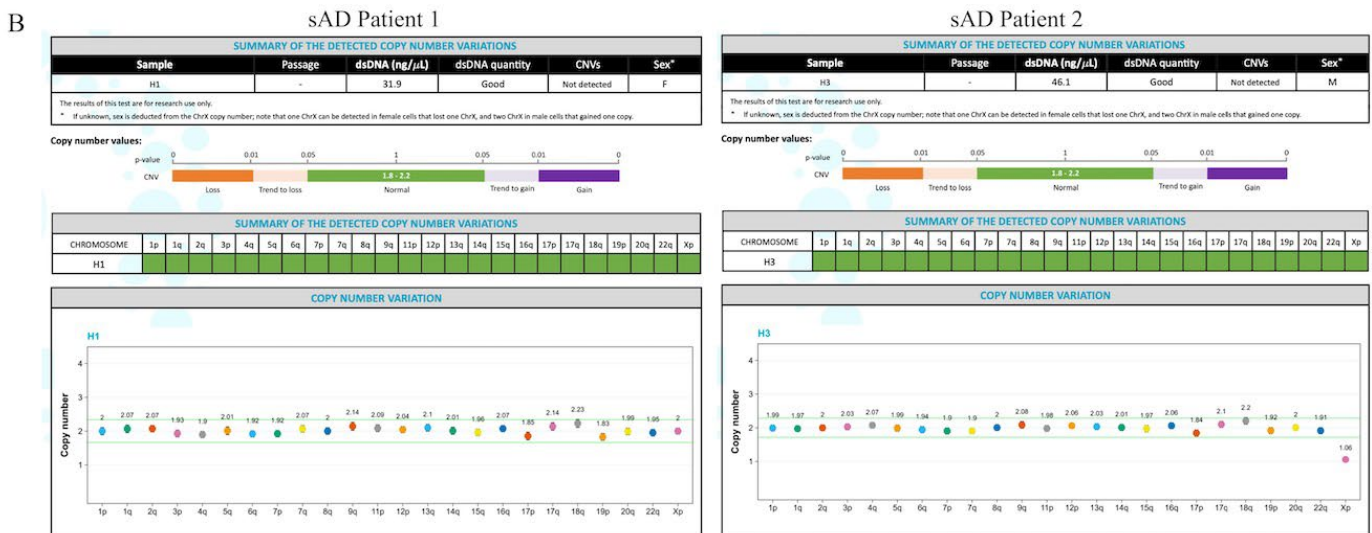

**Figure S2.** Generation, characterization and quality assessment of established sporadic AD hiPSC lines. **A.** Representative ICC images of pluripotency markers OCT4 and NANOG (red), as well as SSEA3 and TRA-1-81 (green). Scale bar 50  $\mu$ m. **B.** Copy number variance (CNV) analysis.

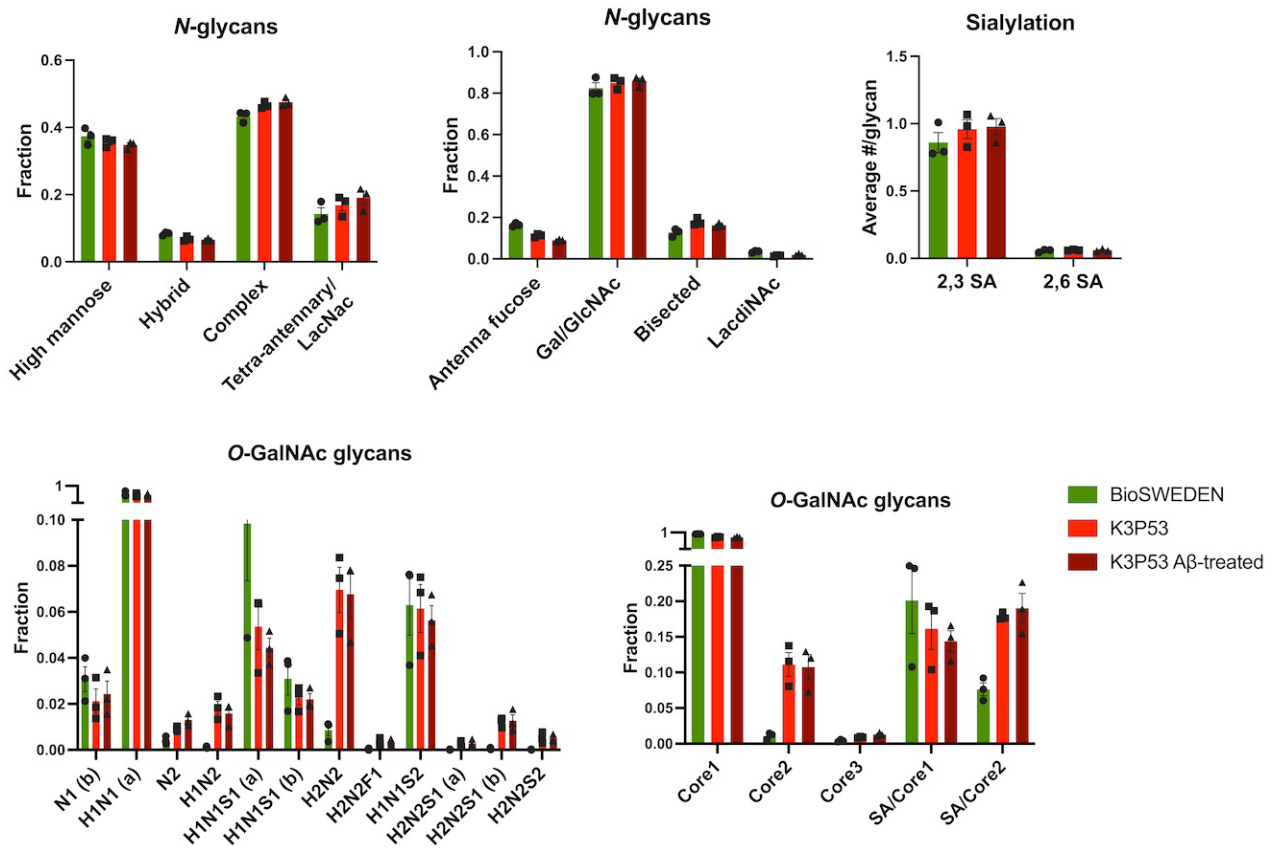

**Figure S3.** *N*- and *O*-glycan profiling of wild-type (K3P53), knock-in BioSweden and A $\beta$ -treated wild-type hiPSC derived neurons.

## 2 Supplementary Tables

**Table S1A.** Summary of cell lines used in the study. Information on cell lines included in the study, displaying name, genotype, disease status, sex, age, karyotype, expression of pluripotency markers and publication reference.

| hiPSC line | Genotype           | Status             | Sex    | Age | Karyotype | Pluripotency associated marker | Reference                  |
|------------|--------------------|--------------------|--------|-----|-----------|--------------------------------|----------------------------|
| L150P      | c.449<br>T>C       | Symptomatic AD     | Male   | 58  | Normal    | +                              | (Tubsuwan et al., 2016)    |
| L150P GC   | Gene correction    | Isogenic control   | Male   | 58  | Normal    | +                              | (Poon et al., 2016)        |
| A79V       | c.236<br>C>T       | Pre-symptomatic AD | Female | 48  | Normal    | +                              | (Li et al., 2016)          |
| A79V GC    | Gene correction    | Isogenic control   | Female | 48  | Normal    | +                              | (Pires et al., 2016)       |
| K3P53      | Wild-type          | Control            | Male   | 18  | Normal    | +                              | (Rasmussen et al., 2014)   |
| Bio SWEDEN | APP <sup>swe</sup> | Knock-in fAD       | Male   | 18  | Normal    | +                              | (Frederiksen et al., 2019) |

|           |   |     |        |    |        |   |     |
|-----------|---|-----|--------|----|--------|---|-----|
| sAD       | - | sAD | Female | 71 | Normal | + | n/a |
| Patient 1 |   |     |        |    |        |   |     |
| sAD       | - | sAD | Male   | 70 | Normal | + | n/a |
| Patient 2 |   |     |        |    |        |   |     |

**Table S1B.** List of antibodies used for immunocytochemistry. Overview of antibodies used for the different immunocytochemistry assessments, including both primary and secondary antibodies, as well as information on dilution factors, company, cat. no. and RRID.

| Assessment          | Antibody          | Dilution | RRID       | Company and Cat. No. |
|---------------------|-------------------|----------|------------|----------------------|
| iPSC verification   | Goat anti-OCT4    | 1:500    | AB_653551  | Santa Cruz: Sc-8628  |
|                     | Rabbit anti-NANOG | 1:500    | AB_1268451 | PeproTech: 500-P236  |
|                     | Rat anti-SSEA3    | 1:100    | AB_1236554 | Biolegend: 330302    |
|                     | Mouse anti-SSEA4  | 1:100    | AB_1089208 | Biolegend: 330402    |
| NPC verification    | Mouse anti-NESTIN | 1:500    | AB_2251134 | Millipore: MAB5326   |
|                     | Rabbit anti-PAX6  | 1:100    | AB_291612  | Covance: PRB-278P    |
| Neurite outgrowth   | Mouse anti-TUJ1   | 1:100    | AB_2210524 | Millipore: MAB1637   |
| Neuron verification | Mouse anti-MAP2   | 1:500    | AB_477171  | Sigma: M1406         |

|                      |                                           |       |             |                                     |
|----------------------|-------------------------------------------|-------|-------------|-------------------------------------|
|                      | Rabbit anti-MAP2                          | 1:500 | AB_10807820 | Millipore: AB2290                   |
|                      | Rabbit anti-TAU                           | 1:200 | AB_10013724 | Dako: A0024                         |
|                      | Rabbit anti-VGLUT                         | 1:500 | AB_887875   | Synaptic systems:<br>135303         |
|                      | Rabbit anti-VGAT                          | 1:500 | AB_2301998  | Millipore: AB5062P                  |
|                      | Rabbit anti-GFAP                          | 1:500 | AB_2109645  | Millipore: AB5804                   |
| Golgi                | Sheep anti-TGN46                          | 1:500 | AB_324049   | Bio-Rad: AHP500                     |
| fragmentation        | Mouse anti-GM130                          | 1:500 | AB_398141   | BD Biosciences: 610822              |
|                      | Mouse anti- $\gamma$ -adaptin             | 1:500 | AB_397768   | BD Biosciences: 610385              |
| Synaptic density     | Rabbit anti-SY38                          | 1:200 | AB_2198854  | Abcam: AB8049                       |
| Secondary antibodies | Alexa Fluor 488 donkey<br>anti-mouse IgG  | 1:500 | AB_141607   | Thermo Fisher Scientific:<br>A21202 |
|                      | Alexa Fluor 488 donkey<br>anti-rabbit IgG | 1:500 | AB_141708   | Thermo Fisher Scientific:<br>A21206 |
|                      | Alexa Fluor 594 donkey<br>anti-mouse IgG  | 1:500 | AB_141633   | Thermo Fisher Scientific:<br>A21203 |
|                      | Alexa Fluor 594 donkey<br>anti-rabbit IgG | 1:500 | AB_141637   | Thermo Fisher Scientific:<br>A21207 |

|                                          |       |            |                                     |
|------------------------------------------|-------|------------|-------------------------------------|
| Alexa Fluor 594 donkey<br>anti-rat IgG   | 1:500 | AB_2535795 | Thermo Fisher Scientific:<br>A21209 |
| Alexa Fluor 594 donkey<br>anti-goat IgG  | 1:500 | AB_2534105 | Thermo Fisher Scientific:<br>A11058 |
| Alexa Fluor 594 donkey<br>anti-sheep IgG | 1:500 | AB_2534083 | Thermo Fisher Scientific:<br>A11016 |

---

**Table S1C.** List of antibodies used for western blot. Overview of antibodies used for the Tau western blot assessment, including both primary and secondary antibodies, as well as information on dilution factors, company, cat. no. and RRID.

| Assessment          | Antibody                                 | Dilution | RRID       | Company and Cat. No.                |
|---------------------|------------------------------------------|----------|------------|-------------------------------------|
| Tau phosphorylation | Rabbit anti-phospho-tau<br>Ser199/Ser202 | 1:1000   | AB_2533749 | Thermo Fisher Scientific:<br>44768G |
|                     | Mouse anti-PHF-Tau 181                   | 1:500    | AB_223651  | Thermo Fisher Scientific:<br>MN1050 |
|                     | Rabbit anti-tau phospho<br>S422          | 1:500    | AB_1603345 | Abcam: Ab79415                      |
|                     | Rabbit anti-phospho-tau<br>Ser396        | 1:1000   | AB_2533745 | Thermo Fisher Scientific:<br>44752G |

---



|                      |                                   |         |             |                      |
|----------------------|-----------------------------------|---------|-------------|----------------------|
| Normalization        | Rabbit anti-GAPDH                 | 1:5000  | AB_10167668 | Santa Cruz: sc-25778 |
|                      | Mouse anti- $\beta$ -actin        | 1:5000  | AB_476744   | Sigma: A5441         |
| Secondary antibodies | IRDye 800CW donkey anti-mouse IgG | 1:15000 | AB_621847   | LI-COR: 926-32212    |
|                      | IRDye 680LT donkey anti-rabbit    | 1:15000 | AB_10706167 | LI-COR: 926-68023    |

**Table S1D.** List of selected differentially expressed genes identified by bioinformatic analyses of RNA sequencing. Overview of selected differentially expressed genes identified through RNA sequencing and bioinformatic analyses, including involved compartment/pathway, gene name and ensemble ID.

| Compartment/Pathway             | Gene   | Ensemble ID     |
|---------------------------------|--------|-----------------|
| Mitochondria - oxidative stress | SCARA3 | ENSG00000168077 |
| Mitochondria - metabolism       | ACSF2  | ENSG00000167107 |
|                                 | NME4   | ENSG00000103202 |
|                                 | ACSS1  | ENSG00000154930 |
|                                 | ACSL6  | ENSG00000164398 |
|                                 | DGAT2  | ENSG00000062282 |

---

|                                         |        |                 |
|-----------------------------------------|--------|-----------------|
|                                         | ME1    | ENSG00000065833 |
|                                         | ACADL  | ENSG00000115361 |
| Mitochondria - ATP/energy<br>production | ACOT11 | ENSG00000162390 |
|                                         | CKMT1B | ENSG00000237289 |
|                                         | CKMT1A | ENSG00000223572 |

---

|                      |        |                 |
|----------------------|--------|-----------------|
| Synapses - receptors | SNAP25 | ENSG00000132639 |
|                      | GRM7   | ENSG00000196277 |
|                      | GRIA1  | ENSG00000155511 |
|                      | SYAP1  | ENSG00000169895 |
|                      | SYP    | ENSG00000102003 |
|                      | GRIN1  | ENSG00000176884 |
|                      | CACNG5 | ENSG00000075429 |
|                      | CHRNA6 | ENSG00000147434 |
|                      | SHC4   | ENSG00000185634 |
|                      | UNC5C  | ENSG00000182168 |

---

---

|         |                 |
|---------|-----------------|
| GABRA2  | ENSG00000151834 |
| GRIA4   | ENSG00000152578 |
| GABRA4  | ENSG00000109158 |
| GABRG2  | ENSG00000113327 |
| CHRNA4  | ENSG00000101204 |
| GLRA3   | ENSG00000145451 |
| CHRM2   | ENSG00000181072 |
| GAD1    | ENSG00000128683 |
| UNC13C  | ENSG00000137766 |
| CDH10   | ENSG00000040731 |
| SYNDIG1 | ENSG00000101463 |
| PPFIBP2 | ENSG00000166387 |
| LRRTM1  | ENSG00000162951 |
| PCLO    | ENSG00000186472 |
| DSCAM   | ENSG00000171587 |
| KCNJ3   | ENSG00000162989 |

---

---

|          |                 |
|----------|-----------------|
| IL1RAPL1 | ENSG00000169306 |
| SLITRK2  | ENSG00000185985 |
| SLITRK1  | ENSG00000178235 |
| SLC8A3   | ENSG00000100678 |
| ASIC2    | ENSG00000108684 |
| TENM2    | ENSG00000145934 |
| SLC4A10  | ENSG00000144290 |
| SH3GL3   | ENSG00000140600 |
| SH3GL2   | ENSG00000107295 |
| CADPS2   | ENSG00000081803 |
| TANC1    | ENSG00000115183 |
| FAM107A  | ENSG00000168309 |
| NRN1     | ENSG00000124785 |
| PDLIM4   | ENSG00000131435 |
| SNCB     | ENSG00000074317 |

---

---

|                         |         |                 |
|-------------------------|---------|-----------------|
| Synapses - vesicles     | SNCG    | ENSG00000173267 |
|                         | CACNA1A | ENSG00000141837 |
|                         | SYNPO   | ENSG00000171992 |
| Synapses - transmission | SH2D5   | ENSG00000189410 |
|                         | KCNA3   | ENSG00000177272 |
|                         | KCNN2   | ENSG00000080709 |
|                         | HTR5A   | ENSG00000157219 |
|                         | SYNC    | ENSG00000162520 |
|                         | SV2C    | ENSG00000122012 |
|                         | SLC17A6 | ENSG00000091664 |
|                         | SLC6A17 | ENSG00000197106 |
|                         | WASF2   | ENSG00000158195 |
|                         | SYT7    | ENSG00000011347 |
|                         | SYT2    | ENSG00000143858 |
|                         | FRMPD4  | ENSG00000169933 |
| Golgi - glycosylation   | GALNT9  | ENSG00000182870 |

---

---

|         |                 |
|---------|-----------------|
| GALNTL6 | ENSG00000174473 |
| GALNT13 | ENSG00000144278 |
| BGN     | ENSG00000182492 |
| DCN     | ENSG00000011465 |
| MAN1C1  | ENSG00000117643 |
| XYLT2   | ENSG00000015532 |
| UGT8    | ENSG00000174607 |
| PLOD3   | ENSG00000106397 |
| MGAT4C  | ENSG00000182050 |
| MGAT3   | ENSG00000128268 |
| CHST9   | ENSG00000154080 |
| SDC4    | ENSG00000124145 |
| B4GALT1 | ENSG00000086062 |
| BCAN    | ENSG00000132692 |
| FUT1    | ENSG00000174951 |

---

---

|                               |              |                 |
|-------------------------------|--------------|-----------------|
|                               | OGN          | ENSG00000106809 |
| Golgi - organization/dynamics | HSPG2        | ENSG00000142798 |
|                               | A4GALT       | ENSG00000128274 |
| Golgi - transport             | CLEC18B      | ENSG00000140839 |
|                               | FYCO1        | ENSG00000163820 |
|                               | GORASP1/2    | ENSG00000114745 |
|                               | GOLGA2/GM130 | ENSG00000167110 |
|                               | COPZ2        | ENSG00000005243 |
|                               | RAB13        | ENSG00000143545 |
|                               | RAB34        | ENSG00000109113 |
|                               | RAB11FIP5    | ENSG00000135631 |
|                               | RAB7B        | ENSG00000276600 |
|                               | PLIN3        | ENSG00000105355 |
|                               | SORL1        | ENSG00000137642 |

---

**Table S1E.** List of primers used for qPCR. Overview of differentially expressed target genes validated by qPCR, including gene name and ensemble ID, as well as forward and reverse primer design.

| Target<br>Gene | Ensemble ID     | Forward Primer          | Reverse Primer        |
|----------------|-----------------|-------------------------|-----------------------|
| CKMT1A         | ENSG00000223572 | GATTCTGCCGAGGCCTCAAA    | CCAGTGCCCAGGTTAGATGG  |
| SCARA3         | ENSG00000168077 | CCGGAACCTCTCCATGATCG    | GCCCTTTCACGCCCATATCT  |
| FYCO1          | ENSG00000163820 | GGCCCCAGAAAGTTTCGGTT    | CCTTGTTCTGTGGGCACTCT  |
| GORASP         | ENSG00000114745 | AGGTCTGGGAAGGGGATATGA   | TCCACAATCTCTCGATGCCG  |
| GOLGA2         | ENSG00000167110 | CTAGCGGTAGCCCTGGACTC    | CCCTGCTTTTGGTGGCATTTC |
| SORL1          | ENSG00000137642 | GGATACGGACTGCCAGGATG    | AGCAATCACGCAGACCATCA  |
| SYNDIG1        | ENSG00000101463 | GCAGCCTTCTACTTGTCCCA    | CACATAGACGCCAGTCCCAA  |
| GRIA4          | ENSG00000152578 | AGGTGAATGTGGACCCAAGG    | CAAGCCGCCAACCAGAATGT  |
| SYT7           | ENSG00000011347 | ACGAAGGGGACCATGTACCG    | CCGCAGAGGACGATAGTGAC  |
| GAPDH          | ENSG00000111640 | CTCTCTGCTCCTCCTGTTTCGAC | TGAGCGATGTGGCTCGGCT   |

**Table S2A.** Statistical analyses of observed cellular phenotypes in seven-week hiPSC derived neurons. Statistical analyses of observed cellular phenotypes in seven-week neurons, including western blot for Tau analysis, mesoscale for A $\beta$  secretion, neurite outgrowth assessment, synaptic density assessment and mitochondria TEM morphometry analysis. Results are displayed as mean  $\pm$  standard error of the mean (SEM) from three replicates.

| Assessment | Cell line | Mean $\pm$ SEM (7 weeks) |
|------------|-----------|--------------------------|
|------------|-----------|--------------------------|



|                              |          |                         |
|------------------------------|----------|-------------------------|
| Western blot (Ser199/Ser202) | L150P    | $3.179 \pm 1.6$         |
|                              | L150P GC | $1.108 \pm 0.1253$      |
|                              | A79V     | $1.423 \pm 0.6141$      |
|                              | A79V GC  | $0.0301 \pm 0.01727$    |
| Western blot (T181)          | L150P    | $3.462 \pm 0.3366^{**}$ |
|                              | L150P GC | $0.9135 \pm 0.1931$     |
|                              | A79V     | $0.036 \pm 0.01069$     |
|                              | A79V GC  | $0.021 \pm 0.01002$     |
| Western blot (S422)          | L150P    | $2.718 \pm 0.4762^{*}$  |
|                              | L150P GC | $0.3592 \pm 0.1359$     |
|                              | A79V     | $2.28 \pm 0.9796$       |
|                              | A79V GC  | $2.2 \pm 1.113$         |
| Western blot (Ser396)        | L150P    | $1.135 \pm 0.203$       |
|                              | L150P GC | $1.098 \pm 0.3337$      |
|                              | A79V     | $2.98 \pm 0.6145$       |

|                                 |           |                            |
|---------------------------------|-----------|----------------------------|
|                                 | A79V GC   | $0.4967 \pm 0.0865$        |
| <hr/>                           |           |                            |
| A $\beta$ 40 (Mesoscale)        | L150P     | $34.42 \pm 1.334^{****}$   |
|                                 | L150P GC  | $54.34 \pm 0.9868$         |
|                                 | A79V      | $36.03 \pm 1.164^{****}$   |
|                                 | A79V GC   | $15.13 \pm 0.6698$         |
|                                 | BioSWEDEN | $92.99 \pm 1.855^{****}$   |
|                                 | K3P53     | $202.5 \pm 0.2531$         |
| <hr/>                           |           |                            |
| A $\beta$ 42 (Mesoscale)        | L150P     | $5.132 \pm 0.1064^{****}$  |
|                                 | L150P GC  | $7.210 \pm 0.02053$        |
|                                 | A79V      | $6.946 \pm 0.1206^{****}$  |
|                                 | A79V GC   | $2.767 \pm 0.03049$        |
|                                 | BioSWEDEN | $13.30 \pm 0.4567^{****}$  |
|                                 | K3P53     | $20.38 \pm 0.1889$         |
| <hr/>                           |           |                            |
| A $\beta$ 42/A $\beta$ 40 ratio | L150P     | $0.1497 \pm 0.002891^{**}$ |
|                                 | L150P GC  | $0.1329 \pm 0.002744$      |

|                                |           |                              |
|--------------------------------|-----------|------------------------------|
|                                | A79V      | $0.1942 \pm 0.009176$        |
|                                | A79V GC   | $0.1845 \pm 0.007334$        |
|                                | BioSWEDEN | $0.1428 \pm 0.002615^{****}$ |
|                                | K3P53     | $0.1006 \pm 0.0008222$       |
| <hr/>                          |           |                              |
| Neurite outgrowth (Length)     | L150P     | $799.28 \pm 126.53$          |
|                                | L150P GC  | $937.77 \pm 135.48$          |
|                                | A79V      | $176.74 \pm 26.7364$         |
|                                | A79V GC   | $196.82 \pm 13.7152$         |
| <hr/>                          |           |                              |
| Synaptic density (SY38 puncta) | L150P     | $23.47 \pm 0.9735^{***}$     |
|                                | L150P GC  | $29.47 \pm 1.14$             |
|                                | A79V      | $14.96 \pm 0.7703^{**}$      |
|                                | A79V GC   | $19.43 \pm 1.293$            |
| <hr/>                          |           |                              |
| Total mitochondria (TEM)       | L150P     | $0.0365 \pm 0.002$           |
|                                | L150P GC  | $0.034 \pm 0.0032$           |
|                                | A79V      | $0.0382 \pm 0.002$           |

|                                |          |                        |
|--------------------------------|----------|------------------------|
|                                | A79V GC  | $0.0308 \pm 0.0051$    |
| <hr/>                          |          |                        |
| Normal mitochondria (TEM)      | L150P    | $0.01539 \pm 0.0014$   |
|                                | L150P GC | $0.01998 \pm 0.002$    |
|                                | A79V     | $0.01846 \pm 0.0023$   |
|                                | A79V GC  | $0.0192 \pm 0.0037$    |
| <hr/>                          |          |                        |
| Cristaeless mitochondria (TEM) | L150P    | $0.01077 \pm 0.0011^*$ |
|                                | L150P GC | $0.00667 \pm 0.0012$   |
|                                | A79V     | $0.01814 \pm 0.0024^*$ |
|                                | A79V GC  | $0.00856 \pm 0.0023$   |
| <hr/>                          |          |                        |
| Mitochondria size (TEM)        | L150P    | $1.1921 \pm 0.04695$   |
|                                | L150P GC | $1.2459 \pm 0.0518$    |
|                                | A79V     | $1.4373 \pm 0.03689$   |
|                                | A79V GC  | $1.4199 \pm 0.0466$    |
| <hr/>                          |          |                        |

**Table S2B.** Statistical analyses of mitochondria and Golgi alteration in five- and seven-week hiPSC derived neurons. Statistical analyses of mitochondria and Golgi alteration in five- and seven-week neurons. Results are displayed as mean  $\pm$  standard error of the mean (SEM) from three replicates.

| Assessment                  | Cell line             | Mean $\pm$ SEM (5 weeks) | Mean $\pm$ SEM (7 weeks) |
|-----------------------------|-----------------------|--------------------------|--------------------------|
| MitoTracker <sup>TM</sup>   | L150P                 | 1472 $\pm$ 482.5         | 800.9 $\pm$ 233.3**      |
| (Mean area of distribution) | L150P GC              | 2603 $\pm$ 1004          | 2249 $\pm$ 309.1         |
|                             | A79V                  | 1358 $\pm$ 110.9         | 808.4 $\pm$ 172.7*       |
|                             | A79V GC               | 1285 $\pm$ 99.88         | 2671 $\pm$ 666.0         |
|                             | BioSWEDEN             | -                        | 745.7 $\pm$ 55.06*       |
|                             | K3P53                 | -                        | 920.1 $\pm$ 54.97        |
| Cis-Golgi surface area      | L150P                 | 256.5 $\pm$ 98.01        | 115 $\pm$ 12.00**        |
| ICC (GM130)                 | L150P GC              | 150.4 $\pm$ 55.29        | 28 $\pm$ 7.9             |
|                             | A79V                  | 187.2 $\pm$ 31.73*       | 140.31 $\pm$ 13.65       |
|                             | A79V GC               | 35.83 $\pm$ 4.550        | 108.9 $\pm$ 24.1         |
|                             | BioSWEDEN             | -                        | 272.0 $\pm$ 29.92**      |
|                             | K3P53                 | -                        | 167.1 $\pm$ 13.88        |
|                             | L150P GC (A $\beta$ ) | -                        | 348.8 $\pm$ 51.89****    |

|                          |                       |                    |                       |
|--------------------------|-----------------------|--------------------|-----------------------|
|                          | A79V GC (A $\beta$ )  | -                  | 152.0 $\pm$ 28.74     |
| Trans-Golgi surface area | L150P                 | 61.63 $\pm$ 7.473  | 36 $\pm$ 4.43*        |
| ICC (TGN38)              | L150P GC              | 35.97 $\pm$ 16.80  | 22 $\pm$ 0.50         |
|                          | A79V                  | 240.0 $\pm$ 40.49* | 49.3 $\pm$ 8.2436*    |
|                          | A79V GC               | 35.97 $\pm$ 16.80  | 25.56 $\pm$ 5.009     |
|                          | BioSWEDEN             | -                  | 371.0 $\pm$ 34.25**** |
|                          | K3P53                 | -                  | 80.84 $\pm$ 5.848     |
|                          | L150P GC (A $\beta$ ) | -                  | 234.3 $\pm$ 24.02**** |
|                          | A79V GC (A $\beta$ )  | -                  | 118.0 $\pm$ 11.85**** |

**Table S2C.** RNA sequencing (RNA-seq) and proteomics statistics. RNA sequencing (RNA-seq) and proteomics statistical data. RNA-seq data is displayed as log2 fold change and adjusted p-value, and proteomic data is demonstrated by abundance ration and adjusted p-value. – indicates no measured expression.

| Gene   | Cell Line | RNA-seq analysis | RNA-seq analysis | Proteomics analysis | Proteomics analysis |
|--------|-----------|------------------|------------------|---------------------|---------------------|
|        |           | Log2 Fold Change | Adjusted p-value | Abundance ratio     | Adjusted p-value    |
| SCARA3 | L150P     | -2.43            | 9.89e-39         | 0.447               | 4.84e-07            |

|        |       |       |          |       |          |
|--------|-------|-------|----------|-------|----------|
|        | A79V  | -2.19 | 6.93e-20 | 0.658 | 8.18e-06 |
| ACSF2  | L150P | -1.14 | 4.22e-24 | 0.79  | 0.0002   |
|        | A79V  | -1.93 | 4.18e-51 | 0.669 | 7.27e-06 |
| NME4   | L150P | -1.18 | 5.34e-13 | 0.828 | 0.16     |
|        | A79V  | -1.15 | 1.62e-18 | 0.788 | 0.02     |
| ACSS1  | L150P | -2.80 | 5.39e-24 | 1.311 | 0.0079   |
|        | A79V  | -2.52 | 1.49e-15 | 0.562 | 2.28e-05 |
| ACSL6  | L150P | 1.85  | 2.15e-25 | 1.645 | 1.19e-06 |
|        | A79V  | 1.797 | 5.23e-15 | 1.275 | 0.0001   |
| DGAT2  | L150P | 1.17  | 2.66e-09 | -     | -        |
|        | A79V  | 1.29  | 4.75e-11 | -     | -        |
| ME1    | L150P | -1.02 | 8.53e-25 | 0.531 | 6.00e-06 |
|        | A79V  | -1.81 | 6.01e-09 | 0.633 | 4.21e-05 |
| ACADL  | L150P | -2.12 | 8.01e-33 | 1.172 | 0.009    |
|        | A79V  | 1.65  | 7.30e-08 | 0.744 | 0.0001   |
| ACOT11 | L150P | 1.02  | 0.015    | -     | -        |
|        | A79V  | -1.55 | 0.0002   | -     | -        |

|        |       |       |           |       |          |
|--------|-------|-------|-----------|-------|----------|
| CKMT1B | L150P | 2.004 | 1.03e-29  | 1.697 | 5.13e-07 |
|        | A79V  | 1.03  | 3.32e-09  | 1.122 | 0.002    |
| CKMT1A | L150P | 1.59  | 2.02e-18  | 1.697 | 5.13e-07 |
|        | A79V  | 1.01  | 1.127e-08 | 1.122 | 0.002    |
| SNAP25 | L150P | 0.95  | 1.49e-46  | 1.661 | 2.94e-05 |
|        | A79V  | 0.72  | 0.001     | 1.154 | 0.01     |
| GRM7   | L150P | 1.90  | 1.85e-120 | 2.31  | 4.74e-07 |
|        | A79V  | 0.20  | 0.35      | 1.278 | 0.0001   |
| GRIA1  | L150P | -1.03 | 4.06e-110 | 0.803 | 7.72e-06 |
|        | A79V  | 1.35  | 3.70e-55  | 1.272 | 4.70e-06 |
| SYAP1  | L150P | -0.24 | 0.03      | 1.08  | 0.02     |
|        | A79V  | -0.21 | 0.03      | 0.992 | 0.97     |
| SYP    | L150P | 0.61  | 5.54e-06  | 1.693 | 2.24e-05 |
|        | A79V  | 1.24  | 1.41e-09  | 1.247 | 0.001    |
| GRIN1  | L150P | 1.10  | 4.70e-06  | -     | -        |
|        | A79V  | 0.82  | 0.0002    | -     | -        |
| CACNG5 | L150P | 2.92  | 2.28e-150 | -     | -        |



|        |       |       |          |       |          |
|--------|-------|-------|----------|-------|----------|
|        | A79V  | 3.24  | 2.70e-42 | -     | -        |
| CHRNA6 | L150P | 1.13  | 0.0001   | -     | -        |
|        | A79V  | 1.96  | 2.71e-25 | -     | -        |
| SHC4   | L150P | 1.36  | 1.24e-32 | -     | -        |
|        | A79V  | 1.85  | 1.37e-24 | -     | -        |
| UNC5C  | L150P | -1.08 | 1.17e-29 | 1.052 | 1        |
|        | A79V  | -1.77 | 6.70e-20 | 0.675 | 0.0001   |
| GABRA2 | L150P | 1.35  | 9.87e-37 | 1.776 | 3.16e-06 |
|        | A79V  | 1.58  | 2.12e-19 | 1.135 | 0.01     |
| GRIA4  | L150P | 1.05  | 1.12e-18 | 1.091 | 0.06     |
|        | A79V  | 1.58  | 8.92e-19 | 1.1   | 0.02     |
| GABRA4 | L150P | 2.00  | 7.07e-36 | -     | -        |
|        | A79V  | 1.39  | 9.93e-12 | -     | -        |
| GABRG2 | L150P | 1.74  | 1.92e-76 | 2.049 | 4.37e-07 |
|        | A79V  | 1.46  | 1.76e-11 | 1.339 | 2.66e-05 |
| CHRNA4 | L150P | 1.16  | 2.71e-08 | -     | -        |
|        | A79V  | 1.39  | 6.49e-10 | -     | -        |

|         |       |       |          |       |        |
|---------|-------|-------|----------|-------|--------|
| GLRA3   | L150P | 1.36  | 6.98e-16 | -     | -      |
|         | A79V  | 1.28  | 1.42e-09 | -     | -      |
| CHRM2   | L150P | 3.46  | 1.25e-69 | -     | -      |
|         | A79V  | 1.17  | 2.83e-09 | -     | -      |
| GAD1    | L150P | 1.69  | 1.74e-83 | 0.786 | 0.001  |
|         | A79V  | 1.38  | 2.13e-31 | 1.315 | 0.0007 |
| UNC13C  | L150P | 1.54  | 2.59e-25 | -     | -      |
|         | A79V  | 1.26  | 2.55e-13 | -     | -      |
| CDH10   | L150P | 1.29  | 2.86e-48 | 0.762 | 0.05   |
|         | A79V  | 1.51  | 1.70e-21 | 1.055 | 0.90   |
| SYNDIG1 | L150P | -1.28 | 7.60e-22 | -     | -      |
|         | A79V  | -1.47 | 1.76e-19 | -     | -      |
| PPFIBP2 | L150P | 1.30  | 4.43e-12 | -     | -      |
|         | A79V  | -1.79 | 1.11e-16 | -     | -      |
| LRRTM1  | L150P | 1.25  | 2.40e-28 | -     | -      |
|         | A79V  | 1.22  | 5.49e-14 | -     | -      |
| PCLO    | L150P | 1.06  | 2.62e-13 | -     | -      |

|          |       |       |           |       |          |
|----------|-------|-------|-----------|-------|----------|
|          | A79V  | 1.49  | 3.08e-19  | -     | -        |
| DSCAM    | L150P | 1.55  | 9.75e-45  | -     | -        |
|          | A79V  | 1.02  | 3.99e-18  | -     | -        |
| KCNJ3    | L150P | 1.80  | 5.60e-43  | -     | -        |
|          | A79V  | 1.69  | 7.01e-16  | -     | -        |
| IL1RAPL1 | L150P | 1.21  | 7.39e-23  | -     | -        |
|          | A79V  | 1.08  | 4.73e-12  | -     | -        |
| SLITRK2  | L150P | 3.08  | 1.15e-221 | 1.567 | 3.48e-06 |
|          | A79V  | 1.03  | 1.61e-10  | 1.169 | 0.004    |
| SLITRK1  | L150P | 1.45  | 1.44e-87  | 1.476 | 2.26e-06 |
|          | A79V  | 1.13  | 3.74e-09  | 1.215 | 0.0002   |
| SLC8A3   | L150P | 1.56  | 4.63e-85  | -     | -        |
|          | A79V  | 1.16  | 2.54e-10  | -     | -        |
| ASIC2    | L150P | 1.31  | 6.21e-09  | -     | -        |
|          | A79V  | 1.36  | 3.92e-10  | -     | -        |
| TENM2    | L150P | -1.24 | 1.09e-64  | 1.012 | 0.96     |
|          | A79V  | 1.20  | 8.59e-10  | 1.495 | 1.28e-06 |

---

|         |       |        |           |       |           |
|---------|-------|--------|-----------|-------|-----------|
| SLC4A10 | L150P | 1.10   | 2.04e-14  | 1.019 | 0.33      |
|         | A79V  | 1.02   | 2.19e-09  | 1.121 | 0.0008    |
| <hr/>   |       |        |           |       |           |
| SH3GL3  | L150P | 1.08   | 2.14e-29  | 1.844 | 8.94e-07  |
|         | A79V  | 1.18   | 5.07e-09  | 1.117 | 0.02      |
| <hr/>   |       |        |           |       |           |
| SH3GL2  | L150P | 1.83   | 3.33e-178 | 2.123 | 4.849e-07 |
|         | A79V  | 1.16   | 5.79e-07  | 1.262 | 0.0003    |
| <hr/>   |       |        |           |       |           |
| CADPS2  | L150P | 2.78   | 3.26e-232 | 1.204 | 0.004     |
|         | A79V  | -1.21  | 7.06e-09  | 2.264 | 1.15e-06  |
| <hr/>   |       |        |           |       |           |
| TANC1   | L150P | -1.78  | 1.13e-105 | -     | -         |
|         | A79V  | -1.009 | 2.03e-08  | -     | -         |
| <hr/>   |       |        |           |       |           |
| FAM107A | L150P | 1.12   | 1.43e-24  | -     | -         |
|         | A79V  | 1.50   | 2.56e-08  | -     | -         |
| <hr/>   |       |        |           |       |           |
| NRN1    | L150P | 2.92   | 2.05e-161 | 2.211 | 5.503e-06 |
|         | A79V  | 1.05   | 2.62e-08  | 1.421 | 0.001     |
| <hr/>   |       |        |           |       |           |
| PDLIM4  | L150P | -1.14  | 1.85e-05  | 0.338 | 1.56e-06  |
|         | A79V  | -1.56  | 3.09e-08  | 0.456 | 1.82e-05  |
| <hr/>   |       |        |           |       |           |
| SNCB    | L150P | 1.23   | 3.30e-08  | 1.713 | 4.14e-05  |

---

|        |       |       |           |       |          |
|--------|-------|-------|-----------|-------|----------|
|        | A79V  | 1.33  | 6.77e-08  | 1.211 | 0.03     |
| SNCG   | L150P | 2.41  | 1.64e-05  | 1.617 | 7.65e-06 |
|        | A79V  | 1.01  | 0.002     | 1.243 | 0.001    |
| CACNA1 | L150P | 1.57  | 1.40e-37  | -     | -        |
| A      | A79V  | 1.37  | 7.91e-08  | -     | -        |
| SYNPO  | L150P | -3.92 | 1.85e-185 | 0.427 | 5.13e-07 |
|        | A79V  | -1.58 | 1.26e-06  | 0.712 | 7.76e-05 |
| SH2D5  | L150P | 1.28  | 1.32e-07  | -     | -        |
|        | A79V  | 1.19  | 2.10e-05  | -     | -        |
| KCNA3  | L150P | 1.15  | 1.68e-14  | 1.085 | 0.19     |
|        | A79V  | 1.02  | 2.90e-05  | 1.324 | 0.006    |
| KCNN2  | L150P | 3.63  | 1.11e-29  | -     | -        |
|        | A79V  | 1.007 | 8.07e-05  | -     | -        |
| HTR5A  | L150P | 1.39  | 0.0005    | -     | -        |
|        | A79V  | 1.15  | 0.0003    | -     | -        |
| SYNC   | L150P | -2.51 | 2.22e-249 | 0.496 | 2.00e-06 |
|        | A79V  | -1.40 | 0.01      | 0.774 | 0.0006   |

|         |       |       |           |       |          |
|---------|-------|-------|-----------|-------|----------|
| SV2C    | L150P | 3.09  | 0.0       | -     | -        |
|         | A79V  | -1.36 | 2.16e-19  | -     | -        |
| SLC17A6 | L150P | 2.85  | 3.17e-146 | 2.896 | 6.21e-07 |
|         | A79V  | 1.44  | 1.64e-14  | 1.392 | 0.0006   |
| SLC6A17 | L150P | 1.46  | 7.29e-22  | 1.559 | 5.98e-07 |
|         | A79V  | 1.47  | 4.13e-13  | 1.333 | 5.61e-06 |
| WASF2   | L150P | -1.26 | 6.29e-142 | 0.462 | 5.44e-07 |
|         | A79V  | -1.24 | 2.84e-12  | 0.67  | 2.28e-05 |
| SYT7    | L150P | 1.08  | 9.13e-17  | 2.257 | 1.98e-06 |
|         | A79V  | 1.06  | 1.98e-08  | 1.059 | 0.40     |
| SYT2    | L150P | 3.46  | 1.93e-46  | 1.315 | 0.01     |
|         | A79V  | 2.26  | 3.05e-26  | 1.422 | 0.002    |
| FRMPD4  | L150P | 1.26  | 8.34e-21  | -     | -        |
|         | A79V  | 1.20  | 1.94e-06  | -     | -        |
| GALNT9  | L150P | 1.52  | 8.91e-07  | -     | -        |
|         | A79V  | 1.46  | 2.36e-11  | -     | -        |

|   |         |       |       |           |       |          |
|---|---------|-------|-------|-----------|-------|----------|
| 6 | GALNTL  | L150P | 1.57  | 4.95e-40  | -     | -        |
|   |         | A79V  | 1.04  | 0.0002    | -     | -        |
|   | GALNT13 | L150P | 1.96  | 3.21e-58  | -     | -        |
|   |         | A79V  | 1.13  | 1.49e-15  | -     | -        |
|   | BGN     | L150P | -2.82 | 4.96e-27  | 1.154 | 0.17     |
|   |         | A79V  | -2.60 | 3.85e-121 | 0.408 | 4.16e-05 |
|   | DCN     | L150P | 3.23  | 5.23e-65  | 1.143 | 0.37     |
|   |         | A79V  | -3.19 | 4.62e-120 | 0.362 | 9.68e-05 |
|   | MAN1C1  | L150P | -1.88 | 1.14e-73  | 0.528 | 2.03e-07 |
|   |         | A79V  | -1.45 | 1.00e-32  | 0.59  | 3.30e-07 |
|   | XYLT2   | L150P | -1.03 | -4.72     | 1.092 | 0.43     |
|   |         | A79V  | -1.29 | 4.51e-16  | 0.952 | 0.99     |
|   | UGT8    | L150P | 2.14  | 9.46e-46  | -     | -        |
|   |         | A79V  | -2.69 | 6.89e-16  | -     | -        |
|   | PLOD3   | L150P | -1.51 | 1.46e-12  | 0.54  | 4.07e-07 |
|   |         | A79V  | -1.12 | 9.02e-13  | 0.592 | 5.77e-07 |
|   | MGAT4C  | L150P | 1.54  | 2.75e-23  | -     | -        |

|         |       |       |           |       |          |
|---------|-------|-------|-----------|-------|----------|
|         | A79V  | 1.65  | 1.14e-12  | -     | -        |
| MGAT3   | L150P | 0.58  | 0.003     | -     | -        |
|         | A79V  | 0.24  | 0.04      | -     | -        |
| CHST9   | L150P | -1.43 | 7.22e-20  | -     | -        |
|         | A79V  | 1.07  | 6.92e-12  | -     | -        |
| SDC4    | L150P | -1.81 | 3.12e-77  | 1.286 | 0.07     |
|         | A79V  | -1.97 | 2.11e-10  | 1.251 | 0.13     |
| B4GALT1 | L150P | -1.25 | 8.33e-42  | -     | -        |
|         | A79V  | -1.70 | 4.87e-09  | -     | -        |
| BCAN    | L150P | 1.34  | 1.56e-12  | 1.94  | 1.18e-05 |
|         | A79V  | 1.81  | 4.69e-08  | 1.512 | 0.0001   |
| FUT1    | L150P | 1.37  | 1.004e-10 | -     | -        |
|         | A79V  | 1.40  | 3.873e-07 | -     | -        |
| OGN     | L150P | -1.22 | 1.58e-05  | 1.065 | 0.52     |
|         | A79V  | -2.13 | 5.88e-07  | 0.422 | 1.91e-05 |
| HSPG2   | L150P | -1.68 | 1.46e-10  | 0.939 | 0.06     |
|         | A79V  | -1.44 | 3.25e-06  | 0.87  | 0.002    |



|                  |       |       |          |       |          |
|------------------|-------|-------|----------|-------|----------|
| A4GALT           | L150P | -3.34 | 1.09e-12 | -     | -        |
|                  | A79V  | -2.58 | 9.15e-06 | -     | -        |
| CLEC18B          | L150P | -2.75 | 1.74e-32 | 0.791 | 0.01     |
|                  | A79V  | -1.57 | 0.009    | 0.931 | 0.27     |
| FYCO1            | L150P | -1.30 | 7.85e-51 | 0.795 | 0.0001   |
|                  | A79V  | -1.38 | 1.62e-18 | 0.754 | 3.24e-05 |
| GORASP           | L150P | -0.37 | 0.001    | 0.978 | 1        |
| 1/2              | A79V  | -0.28 | 1.23e-07 | 1.002 | 1        |
| GOLGA2/<br>GM130 | L150P | -0.18 | 0.14     | 1.021 | 0.27     |
|                  | A79V  | -0.80 | 2.42e-56 | 0.82  | 1.15e-05 |
| COPZ2            | L150P | -2.30 | 1.05e-41 | 0.866 | 0.02     |
|                  | A79V  | -3.31 | 3.67e-78 | 1.375 | 0.50     |
| RAB13            | L150P | -1.01 | 8.52e-17 | 0.591 | 5.21e-05 |
|                  | A79V  | -1.58 | 1.66e-15 | 0.95  | 0.23     |
| RAB34            | L150P | -1.19 | 1.05e-18 | 0.61  | 4.53e-06 |
|                  | A79V  | -1.79 | 3.94e-15 | 0.519 | 1.13e-06 |

---

|         |       |       |          |       |      |
|---------|-------|-------|----------|-------|------|
| RAB11FI | L150P | -1.01 | 3.34e-09 | 0.961 | 0.87 |
| P5      | A79V  | -1.04 | 3.87e-14 | 1.178 | 0.01 |

---

|       |       |       |          |   |   |
|-------|-------|-------|----------|---|---|
| RAB7B | L150P | -1.69 | 1.66e-19 | - | - |
|       | A79V  | -1.63 | 2.93e-13 | - | - |

---

|       |       |       |          |       |          |
|-------|-------|-------|----------|-------|----------|
| PLIN3 | L150P | -1.30 | 1.17e-12 | 0.536 | 1.22e-06 |
|       | A79V  | -1.13 | 1.82e-08 | 0.411 | 5.34e-07 |

---

|       |       |      |          |       |       |
|-------|-------|------|----------|-------|-------|
| SORL1 | L150P | 0.48 | 8.98e-13 | 1.042 | 0.69  |
|       | A79V  | 1.26 | 8.50e-19 | 1.05  | 0.195 |

---
